# Supplementary material for: Numerical Analysis of Glauert Inflow Formula for Single-Rotor Helicopter in Steady-Level Flight below Stall-Flutter Limit
Source: MDPI journal article supplement (doi:10.3390/aerospace10030238), 2023-02-28
Supplement: s1 [file s1]

**Table S1.** Percentage of failed convergence, PoF (%) generated by Newton-Raphson method used with (NRf) and without (NR) relaxation factor in solving of Equation (6),  $\varepsilon = 5 \cdot 10^{-n}$ .

| $\lambda_q$    | <b>n</b> | <b>Equation 6</b> |            |                            |                            |
|----------------|----------|-------------------|------------|----------------------------|----------------------------|
|                |          | <b>NR</b>         | <b>NRf</b> | <b>IP max <sup>1</sup></b> | <b>IP min <sup>2</sup></b> |
| $\lambda_q$    | 16       | 2.16              | 0.28       | 2.16                       | 2.15                       |
|                | 14       | 0                 | 0          | 0                          | 0                          |
| $\lambda_h$    | 16       | 2.11              | 0.28       | 2.11                       | 2.08                       |
|                | 14       | 0                 | 0          | 0                          | 0                          |
| $\lambda_{wj}$ | 16       | 2.11              | 0.28       | 2.11                       | 2.11                       |
|                | 14       | 0                 | 0          | 0                          | 0                          |
| $\lambda_{md}$ | 16       | 2.11              | 0.28       | 2.11                       | 2.11                       |
|                | 14       | 0                 | 0          | 0                          | 0                          |

<sup>1</sup>One-point methods – maximum value of PoF (%) from Table 12

<sup>2</sup>One-point methods – minimum value of PoF (%) from Table 12
