# Supplementary material for: Numerical Analysis of Glauert Inflow Formula for Single-Rotor Helicopter in Steady-Level Flight below Stall-Flutter Limit
Source: MDPI journal article supplement (doi:10.3390/aerospace10030238), 2023-02-28
Supplement: s1 [file s1]

**Table S2.** Comparative view of the computational time (in seconds) for 21442340 numerical calculations of rational GIF forms with various parameters (in APR zone),  $\varepsilon = 5 \times 10^{-14}$

| Methods           | Equation 5  |                |                | Equation 3  |                |                |
|-------------------|-------------|----------------|----------------|-------------|----------------|----------------|
|                   | $\lambda_h$ | $\lambda_{wj}$ | $\lambda_{md}$ | $\lambda_h$ | $\lambda_{wj}$ | $\lambda_{md}$ |
| Halley            | 42.946777   | 42.870691      | 42.596240      | 40.655886   | 40.047992      | 40.345553      |
| Chebyshev         | 43.219398   | 42.111421      | 41.855935      | 40.004003   | 39.388638      | 40.153255      |
| Kiss              | 42.941055   | 41.737283      | 41.794937      | 40.147708   | 40.086685      | 39.794306      |
| E5                | 42.618547   | 41.787981      | 41.339767      | 40.489100   | 40.611620      | 39.645964      |
| NR                | 40.926284   | 40.938882      | 40.144382      | 42.094548   | 42.064096      | 41.566620      |
| NR with $f = 0.5$ | 62.256496   | 59.708629      | 56.368570      | 62.391468   | 62.599268      | 63.969490      |
| Ostrowski         | 40.371375   | 39.939973      | 39.164714      | 39.399960   | 40.834458      | 39.272933      |
| Chun              | 41.658960   | 40.617792      | 39.335719      | 41.024620   | 39.640031      | 38.922740      |
| Cordero           | 41.649320   | 40.576487      | 39.022771      | 40.210814   | 39.669440      | 39.252490      |
| Jarratt           | 44.636057   | 43.763875      | 43.763875      | 41.108508   | 40.633884      | 39.848276      |
| Sharma–Sharma     | 14.029324   | 13.770798      | 12.924294      | 6.794839    | 6.174767       | 5.264773       |
| BWR               | 27.160309   | 30.543855      | 26.684198      | 15.768769   | 18.384367      | 16.790652      |
| BWR II            | 15.732240   | 14.874323      | 14.629713      | 7.316476    | 6.252836       | 5.951916       |
| KT                | 13.874334   | 13.791948      | 13.296686      | 6.507381    | 5.768058       | 4.953166       |
